# Supplementary material
Source: HighWire-hosted journal article supplement (https://bmjopensem.bmj.com/content/3/1/e000252)
Supplement: inline-supplementary-material-1 [file inline-supplementary-material-1.docx]

Características espacio temporales de las actividades motrices realizadas por atletas ciegos en salto de longitud

**RESUMEN**

**Contexto:** Las personas ciegas dependen de medios de reconocimiento espacial, en la vida diaria y en la competición deportiva.

**Objetivos:** El objetivo de este estudio fue determinar las características espacio temporales en la realización de salto de longitud por parte de atletas ciegos y comparar éstas con lo que realizan los atletas sin discapacidad.

**Métodos:** La muestra estuvo compuesta por 12 atletas masculinos ciegos, participantes en la categoría F11 en la final del salto de longitud en los Juegos Paralímpicos Londres 2012. Su participación fue recogida por 4 cámaras de alta velocidad y un radar que medía la velocidad de carrera. Las imagines fueron procesadas usando un software validado.

**Resultados:** La carrerade aproximación de los atletas ciegos es más corta que la de los atletas sin discapacidad. Se han observado diferencias estadísticamente significativas de la velocidad del BCM e incremento de la velocidad de entrada hasta el último paso, a diferencia de los discapacitados visuales y no discapacitados que disminuyen ésta en el último paso o la mantienen. En el aspecto espacial observamos que la longitud de los tres últimos pasos es el único parámetro que no es significativo con el resultado de la prueba. Los saltadores ciegos no acortan el último paso, más bien lo alargan. El tiempo de batida es mayor que el que realizan los atletas sin discapacidad.

**Conclusión:** Las acciones de los saltadores de longitud ciegos, a diferencia de los no discapacitados, no varían sus acciones durante la carrera de aproximación para realizar una colocación óptima en la tabla de batida.

**Introducción**

La característica más importante de la actividad atlética que realizan las personas ciegas es que requieren de la ayuda de un guía vidente, que proporciona las ayudas reglamentarias necesarias para que el atleta ciego pueda orientarse en el espacio y conseguir el mejor resultado posible, en este caso, en el salto de longitud. Organización, identificación e interpretación de la información sensorial con la idea de representar y entender el medio ambiente representan uno de los procesos psicológicos básicos más importantes del ser humano. (Gregory, 1968, 1997, 1998, 2004, Johns y Saks, 2010 y Palmi, 2007).

La noción de espacio, igual que la de tiempo, no es innata. El deportista va tomando lentamente conciencia del espacio a través de las primeras percepciones de su cuerpo y de los cambios que ocurren, tales como progresos motores y sensoriales. Para lograr eficacia en los movimientos locomotores es preciso que posea los conceptos de posición, ubicación, dirección y distancia (Codina, 2004 y Rosa y Ochaita, 1993). La representación espacial en la persona ciega sigue un proceso diferente, más lento y complicado, precisando una información exacta y un entrenamiento adecuado.

La percepción espacial se interpreta dentro de cada persona desde el punto de vista de la posición de un objeto en el espacio. Se realiza generalmente a través de los datos aportados por la vista, el tacto o por los sentidos cenestésicos y de su elaboración intelectual. La comprensión de la noción del espacio se irá completando con la orientación del espacio y del mismo individuo. Las capacidades perceptivo-espaciales engloban la habilidad para ubicarse a uno mismo y a los objetos en el espacio, el uso de las referencias del medio y la capacidad para desenvolverse en él (Dolins y Michell, 2010 y Hatfield, 1990).

Cuando hay una discapacidad visual, resulta mucho más difícil recoger, procesar, almacenar y recuperar la información de tipo figurativo y espacial. Es estos casos es preciso recurrir a los otros sentidos, pero éstos proporcionan los datos de forma lenta, fragmentaria y plantean dificultades para anticipar la información, llevando a las personas ciegas a relacionarse con el espacio de manera cualitativamente distinta a la de los videntes (Rosa y Ochaita, 1993).

Se consideran personas con ceguera aquellas que tienen ausencia total de visión o que solo perciben luz, siendo su agudeza visual máxima inferior a 0,05 o su campo tiene una restricción inferior a 10º (Codina, 2004). Dentro del deporte, The International Paralympic Committee (IPC) clasifica como atletas ciegos (T/F11) aquellos atletas que tienen muy baja agudeza visual y/o no percepción de luz (IPC, 2011).

El atletismo es una de las disciplinas emblemáticas del deporte de personas con alguna discapacidad, desarrollándose bajo las normas que establece la International Association of Athletics Federations (IAAF) y las adaptaciones que propone el International Olympic Committee (IPC) y la International Blind Sports Federation (IBSA) (Comité Paralímpico Español, 2006).

Desde 1976, el atletismo paralímpico engloba entre sus especialidades el salto de longitud para ciegos (categoría F11) (Webborn, 1999), debiendo el atleta realizar una carrera de aproximación, batida, vuelo y caída en el foso, orientándose por medio de un guía en la carrera, y adaptarse a los mecanismos técnicos adecuados a la entrada a la batida, ejecución de ésta y orientación espacio-temporal. Estos atletas realizan la batida sobre un rectángulo de 1.00 m x 1.22 m (IPC 2011, Rule 185) y los competidores pueden utilizar un guía que les orienta por la voz o algún otro medio acústico durante la carrera de aproximación. La longitud del salto se valora desde la huella que ha dejado el saltador en el rectángulo de batida hasta la huella más retrasada que deja en la caída en el foso de arena. La carrera de aproximación a la tabla de batida en salto de longitud es una habilidad que desempeña un papel importante en el éxito del salto. Ésta depende principalmente de la consistencia de la longitud del paso, el número de éstos, y el patrón de desarrollo de una velocidad óptima en la entrada a la batida (Bridgett and Linthorne, 2006; Bruggemann and Conrad, 1986; Fukashiro, 1989; Hay, 1986; Hay, 1993; Hay and Miller, 1985; Hay and Nohara, 1990; Hay et al., 1986; Koyama et al., 2011; Mendoza y Nixdorf, 2011, Panoutsakopoulos et al., 2010, Schiffer, 2011). El análisis de estas variables se ha relacionado con la batida y la distancia oficial y efectiva del salto.

La fase final de la carrera sirve para preparar la batida, por lo que se producen ciertos cambios en las características de los últimos pasos. Los atletas sin discapacidad visual pueden hacer un ajuste visual de su carrera en los últimos pasos con el fin de iniciar el salto lo más cerca posible de la línea de batida y preparar ésta, lo cual obliga a ciertos cambios en la longitud de los últimos pasos(Hay, 1988; Montagne et al., 2000). Los atletas ciegos no pueden hacer el ajuste visual por lo que se puede expresar la hipótesis de que las modificaciones en los últimos pasos, si se producen, se deben atribuir a la preparación de la batida sin interferencia del ajuste final de la carrera.

El objetivo de este estudio fue determinar las características espacio temporales que realizan los atletas ciegos en el salto de longitud, participantes en los Paralympic Games London 2012, analizando las variables indicadas en los tres últimos pasos anteriores a la batida en la carrera de aproximación, y así poder comprobar las adaptaciones espacio-temporales que realizan estos atletas con respecto a lo que indica la literatura de atletas sin discapacidad.

Criterios éticos

El estudio fue aprobado por el Comité de Bioética de la Universidad de Barcelona (Institucional Review Board IRB00003099). Los participantes recibieron información respecto al protocolo prospectivo de forma escrita aceptando la participación y consintiendo la utilización de sus datos, preservando el anonimato, respetando los acuerdos de la Declaración de Helsinki en su revisión de octubre del año 2000, elaborada por The World Medical Association (WMA)

**Método**

**Participantes**

La muestra estuvo compuesta por 12 atletas masculinos (altura 1.79±0.08 m, peso 73.7±6.4 kg y distancia oficial de 5.82 ±0.45 m.) de la categoría ciegos (F11), participantes en la final del salto de longitud en los XIV Juegos Paralímpicos celebrados en Londres 2012, representando a 10 países.

**Instrumentos**

Para el estudio se utilizaron 4 cámaras Exilim F1 (Casio, Japan), validada por Nojima (2011), situadas sobre trípodes Manfrotto 141RC (Cassola, Italy). 2 cámaras grabaron en alta velocidad (512x384 píxeles a 300 Hz), en barrido siguiendo al atleta desde el comienzo de la carrera de aproximación hasta la finalización del salto en el foso, con el fin de obtener datos temporales, y otras 2 cámaras, fijas, grabaron en alta definición (1280x720 píxeles a 30 Hz), para datos temporales. Se situaron todas ellas fuera de la zona de competición, perpendiculares al pasillo de saltos, a una altura de 5 m y a una distancia de 20 m del pasillo de saltos. Para la calibración del espacio se utilizaron marcadores blancos (5x5 cm) colocados en la parte externa y a ambos lados del pasillo de aproximación a la batida y separados una distancia de un metro entre ellos. La captura de imagen y de velocidad se hizo sin interferir en la competición, por lo que no se usaron marcadores sobre los atletas, ni objetos que pudieran molestar, lo que se conoce como un análisis observacional ecológico.

El instrumento de registro utilizado para la extracción de los datos mecánicos a partir de las imágenes fue el programa Kinovea 0.8.15 (Balsalobre-Fernández, Tejero-González, del Campo-Vecino y Bavaresco, 2014.), realizándose el análisis por parte de dos observadores expertos independientes.

**Procedimiento**

Se grabaron los saltos realizados por todos los atletas ciegos y específicamente se tuvo en consideración la carrera de aproximación a la batida, con el fin de obtener la información sobre la orientación espacio temporal y las características mecánicas de los tres últimos pasos antes de la batida y en ésta.

*OJO a las abreviaturas. Hay que unificar y todas han de estar en inglés.*

*Yo pondría: Las variables analizadas se describen en la tabla 1.*

**Table 1**. Biomechanical parameters, abbreviations used and the definitions and methods used for determining the parameters.

| Parameter (unit) | Abbreviation | Definition and method |
| --- | --- | --- |
| Official distance (m) | DOFF | Distance at X-axis from the take-off line to the nearest break in the landing area made by any part of the body. |
| Toe-to-board distance (m) | DTTB | Distance at X-axis from the toe of the take-off foot to the take-off line. |
| Effective distance (m) | DEFF | The sum of DOFF + DTTB. The horizontal distance the athlete has to jump, measured from the toe of the take-off foot at the time of take-off to the nearest mark made by the athlete in the sand. |
| Contact time (s) | TC3, TC2, TC1 | The time of support of the foot on the floor for the antepenultimate, penultimate and last strides respectively. It is measured from the time of touchdown (the first video frame where the landing foot clearly contacts the ground) to the time of take-off (the last video frame where the foot has clearly contacted the ground) |
| Flight time (s) | TF3, TF2, TF1 | The time that the athlete is in the air for the antepenultimate, penultimate and last strides respectively. It is measured from the time of take-off (the first video frame where the foot has clearly left the ground) to the time of touchdown (the last video frame where the landing foot is clearly in the air) |
| Stride time (s) | TS3, TS2, TS1 | The sum of Tc3 + TF3;TC2 + TF2;TC1 + TF1 respectively. |
| Stride length (m) | LS3, LS2, LS1 | Distance at X-axis between toe-off point to the next toe-off point of the last 3 approach strides. |
| Stride frequency (Hz) | FS3, FS2, FS1 | The number of strides that the athlete takes over per second for the antepenultimate, penultimate and last strides respectively. |
| Stride velocity (m/s) | VS3, VS2, VS1 | Velocity during the last three approach strides calculated as average stride velocity from the first ground contact of one stride to the first ground contact of the next stride (contact phase + flight phase), for the antepenultimate, penultimate and last strides (LS/TS) respectively (FS*LS). |
| Horizontal velocity during the last 3 strides (m/s) | Vx3, Vx2, Vx1 | BCM velocity at X-axis at the time of take-off for the antepenultimate, penultimate and last strides measured by radar. |
| Vertical velocity during the last 3 strides (m/s) | Vy3, Vy2, Vy1 | BCM velocity at Y-axis at the time of take-off for the antepenultimate, penultimate and last strides. |
| Resultant velocity (m/s) | Vr3, Vr2, Vr1 | for the antepenultimate, penultimate and last strides. |
| BCM height (m) | h3, h2, h1 | BCM height at Y-axis at the flight phase for the antepenultimate, penultimate and last strides (1,226*TF2) |
| Take-off stride angle (º) | a3, a2, a1 | Velocity angle at the take-off during the run-up for the antepenultimate, penultimate and last strides: tan-1 (Vy/Vx). |
| Relative difference stride length LS2/LS3 (%) | RdL2/3 | The percentage length difference between on-approach stride and the previous one, for the penultimate and the antepenultimate strides. |
| Relative difference stride length LS1/LS2 (%) | RdL1/2 | The percentage length difference between on-approach stride and the previous one, for the last and penultimate strides. |
| Relative difference stride frequency 2FS/3FS (%) | RdF2/3 | The percentage frequency difference between on-approach stride and the previous one, for the penultimate and the antepenultimate strides. |
| Relative difference stride frequency 1FS/2FS (%) | RdF1/2 | The percentage frequency difference between on-approach stride and the previous one, for the last and penultimate strides. |

*TAL VEZ LOS DOS PÁRRAFOS ANTERIORES SE PUEDEN SUPRIMIR. Y añadir:*

Una vez obtenidos los datos de tiempo de contacto y tiempo de vuelo, así como distancia del paso, se calcularon otras variables aplicando las siguientes fórmulas: PONER ANTES

*Yo pondría las fórmulas directamente. Ojo a las abreviaturas.*

TS (s) se calculó a partir de TS = TC+TF

FS (Hz) se obtuvo de FS = 1/TS

VS (m/s) se calculó VS = FS x LS y se comprobó mediante VS = LS / TS

Vy (m/s) se calculó a partir del TF mediante Vy = g.TF/2 = 4,9 x TF

h (m) se calculó h = ½ g x (TF/2)2 = 1,226 x TF2

Vr (m/s) se calculó Vr = (VS2 + Vy2)0,5

a (º) se calculó a = tan-1 (Vy/Vx)

**Procedimiento**

La prueba utilizada es el ANOVA de un factor de medidas repetidas donde comparamos las medias de las variables analizadas de los 3 últimos pasos de todos los atletas. En este caso la variable independiente lo constituye un factor intra-sujeto, el resultado del salto, con 11 variables dependientes**.**

***OJO ¿Cuál es la dependiente?***

***OJO Step o Stride, Unificar.***

La prueba post-hoc de Bonferroni, la más conservadora, es para los diferentes pasos, parecida a la prueba *t* de Student, pero dividiendo el error (0.05) por el número de comparaciones que se realicen. Las hipótesis que se plantean son: la hipótesis nula H0, donde las medias de los diferentes pasos son iguales, y la hipótesis alternativa H1, las medias de los diferentes pasos son significativamente diferentes.

Los supuestos para aplicar este tipo de diseño son: la normalidad y la esfericidad relativa a las varianzas de las diferencias entre pares de medidas deben ser similares. Dado que no se cumple la normalidad, aunque el ANOVA es robusto frente a este incumplimiento, es decir, puede controlar el error de tipo I (no aumenta), se ha utilizado la alternativa no paramétrica que es la prueba de Friedman, para conocer si hay diferencias estadísticamente significativas entre los distintos pasos, pero no indica entre qué pares de condiciones, existen las diferencias.

Siendo el estadístico calculado del análisis de varianza por rangos de Friedman, H representa el número de saltos, K el número de variables relacionadas y la suma de rangos por columnas al cuadrado. No necesita una distribución específica, mínimo, un nivel ordinal para las variables dependientes. ***OJO*** Se comparan más de dos mediciones de rangos (medianas) para determinar que las diferencias no se deban al azar.

En el diseño de la investigación se considera el tamaño de la muestra y la potencia estadística que lograríamos con ella. No obstante, en aquellos estudios donde dicho paso ha sido omitido resulta importante el cálculo y especificación del tamaño del efecto como estrategia de análisis post-hoc. Aunque la práctica de realizar cálculos post hoc ha sido cuestionada, dado que no permite planear apropiadamente el estudio ni corregir los errores de diseño, acompañar las pruebas de significación con la cuantificación de la magnitud del efecto alcanzado permite, al menos, comprender adecuadamente los resultados del análisis.

Para ello utilizamos las pruebas post-hoc, ajustando el error. La prueba de Bonferroni puede ser demasiado conservadora al comparar momentos de tiempo y con una muestra pequeña. En circunstancias como estas se puede justificar no utilizarla, ya que puede ser causa de pérdida de posibles diferencias. La prueba de Holm se basa en la desigualdad de Bonferroni y es válida independientemente de la distribución conjunta de los estadísticos de prueba. La corrección de Holm es menos conservadora que la corrección de Bonferroni y por lo tanto es más potente. Utiliza un procedimiento paso a paso para examinar el conjunto ordenado de hipótesis nulas, comenzando con el menor valor de P y continuando hasta que no puede rechazar una hipótesis nula.

**Resultados**

El primer resultado es la aplicación del test de Friedman, sobre todas las variables dependientes. OJO Excepto la variable Ls (step length), en el resto de variables los valores obtenidos son mayores, por lo tanto, hay pruebas suficientes para rechazar la hipótesis nula y concluir que hay diferencias significativas entre los distintos pasos (1, 2 y 3) del salto (Tabla 2).

Tabla 2. Test de Friedman

| Variable | Friedman | df | p-value | Median 1 | | Median 2 | | Median 3 |
| --- | --- | --- | --- | --- | --- | --- | --- | --- |
| a | 18,426 | 2 | 9,976e-05 | 2,80 | 4,30 | | 4,35 | |
| Fs | 12,905 | 2 | 0,0011 | 4,50 | 4,00 | | 4,05 | |
| h | 18,426 | 2 | 9,976e-05 | 0,85 | 2,10 | | 1,95 | |
| Ls | 4,5 | 2 | 0,105 | 2,15 | 2,20 | | 1,99 | |
| Tc | 20,723 | 2 | 3,162e-05 | 0,13 | 0,11 | | 0,12 | |
| Tf | 18,167 | 2 | 0,0001 | 0,08 | 0,13 | | 0,12 | |
| Ts | 17,333 | 2 | 0,0001 | 0,22 | 0,25 | | 0,25 | |
| Vr | 18,541 | 2 | 9,418e-05 | 8,40 | 8,30 | | 8,20 | |
| Vs | 18,5 | 2 | 9,611e-05 | 9,60 | 9,00 | | 8,05 | |
| Vx | 20,667 | 2 | 3,253e-05 | 8,38 | 8,26 | | 8,18 | |
| Vy | 18,465 | 2 | 9,784e-05 | 0,40 | 0,60 | | 0,60 | |

*Ojo: desarrollar más el enunciado, estilo de tabla.*

Para dicho rechazo se recurre a una convención (Morrison & Henkel, 2006), que fija el nivel de confianza de la estimación en el campo de la psicología en α=0.05 (p<0.05; que corresponde a un 5% de error)

Para el cálculo del tamaño del efecto las pruebas post-hoc, indicando la no existencia de diferencias estadísticamente significativas entre las variables a2-a3, fs2-fs3, h2-h3, Tf2-Tf3, Ts2-Ts3, Vy2-Vy3. Sin embargo sí existen diferencias estadísticamente significativas entre a1-a2, a1-a3, fs1-fs2, fs1-fs3, h1-h2, h1-h3, Ls1-Ls2, Ls2-Ls3, Tc1-Tc2, Tc1-Tc3, Tc2-Tc3, Tf1-Tf2, Tf1-Tf3, Ts1-Ts2, Ts1-Ts3, Vr1-Vr2, Vr1-Vr3, Vr2-Vr3, Vs1-Vs2, Vs1-Vs2, Vs2-Vs3, Vx1-Vx2, Vx1-Vx3, Vx2-Vx3, Vy1-Vy2, Vy1-Vy3 (Tabla 3).

Tabla 3. Pruebas post-hoc

| Variable | Post-hoc | Statistic | Correction Bonferroni | Correction Holm |
| --- | --- | --- | --- | --- |
| A | a1-a2 | 10,995 | 6,264e-10 | 6,264e-10 |
|  | a1-a3 | 10,401 | 1,760e-09 | 1,173e-09 |
|  | a2-a3 | 0,594 | 1 | 0,558 |
| fs | fs1-fs2 | 7,496 | 5,119e-07 | 3,413e-07 |
|  | fs1-fs3 | 7,764 | 2,898e-07 | 2,898e-07 |
|  | fs2-fs3 | 0,267 | 1 | 0,791 |
| H | h1-h2 | 10,995 | 6,264e-10 | 6,264e-10 |
|  | h1-h3 | 10,401 | 1,760e-09 | 1,173e-09 |
|  | h2-h3 | 0,5943 | 1 | 0,558 |
| Ls | Ls1-Ls2 | 3,785 | 0,001 | 0,003 |
|  | Ls1-Ls3 | 0,000 | 1 | 1 |
|  | Ls2-Ls3 | 3,785 | 0,001 | 0,003 |
| Tc | Tc1-Tc2 | 14,247 | 4,131e-12 | 4,131e-12 |
|  | Tc1-Tc3 | 8,095 | 1,454e-07 | 9,695e-08 |
|  | Tc2-Tc3 | 6,152 | 1,026e-05 | 3,420e-06 |
| Tf | Tf1-Tf2 | 11,076 | 5,458e-10 | 5,458e-10 |
|  | Tf1-Tf3 | 9,910 | 4,260e-09 | 2,840e-09 |
|  | Tf2-Tf3 | 1,165 | 0,768 | 0,256 |
| Ts | Ts1-Ts2 | 9,703 | 6,247e-09 | 4,165e-09 |
|  | Ts1-Ts3 | 10,309 | 2,073e-09 | 2,073e-09 |
|  | Ts2-Ts3 | 0,606 | 1 | 0,550 |
| Vr | Vr1-Vr2 | 5,716 | 2,841e-05 | 9,473e-06 |
|  | Vr1-Vr3 | 12,442 | 5,932e-11 | 5,932e-11 |
|  | Vr2-Vr3 | 6,725 | 2,778e-06 | 1,852e-06 |
| Vs | Vs1-Vs2 | 5,306 | 7,540e-05 | 2,513e-05 |
|  | Vs1-Vs3 | 12,382 | 6,509e-11 | 6,509e-10 |
|  | Vs2-Vs3 | 7,075 | 1,275e-06 | 8,505e-07 |
| Vx | Vx1-Vx2 | 5,114 | 1,197e-04 | 3,990e-05 |
|  | Vx1-Vx3 | 14,065 | 5,333e-12 | 5,333e-12 |
|  | Vx2-Vx3 | 8,951 | 2,612e-08 | 1,741e-08 |
| Vy | Vy1-Vy2 | 10,889 | 7,517e-10 | 7,517e-10 |
|  | Vy1-Vy3 | 10,578 | 1,289e-09 | 8,596e-10 |
|  | Vy2-Vy3 | 0,311 | 1 | 0,758 |

*Ojo: desarrollar más el enunciado, y lo que está sombreado.*

**Discusión *OJO. Todos los párrafos siguientes están mal justificados (se cortan mal las palabras al final de las líneas)***

Los resultados obtenidos nos permiten observar cuáles son las variables espacio-temporales de los pasos de la carrera que creemos actúan sobre el resultado del salto de longitud en los atletas ciegos y qué modificaciones realizan con respecto a lo que indica la literatura en atletas sin discapacidad visual. En la literatura hemos encontrado pocos estudios que orienten sobre la actividad que realizan los ciegos en la carrera de aproximación a la tabla de batida y ejecución de ésta (Theodorou & Skordilis, 2012; Torralba, Padullés, Braz y Robert, 2015) y en discapacitados visuales (Theodorou et al., 2011; Theodorou et al., 2012).

La regulación espacial de la carrera de aproximación en el salto de longitud en los atletas videntes viene dada por el número de pasos que desarrollan los atletas y por la regulación visual del propio atleta dirigiéndose a la tabla de batida, teniendo una correlación positiva con la distancia de salto (Bradshaw & Aisbett, 2006), lo que sugiere el uso de la regulación visual (Scott, Li & Davids, 1997). Como los atletas ciegos no tienen visión o un resto visual de luz, y además la normativa federativa iguala a todos los competidores haciendo llevar gafas oscuras o antifaz durante la competición (IPC, 2016), deberán sustituir su enfoque visual en la carrera por la orientación sonora que desarrolla el guía mediante palmas o por voz. Debido a esa dificultad para orientarse en el espacio, los atletas invidentes realizan una carrera de menor distancia que los atletas videntes, de 22 a 32 m en los Juegos Paralímpicos de Londres, por 28 a 44 m los atletas videntes ((Schiffer, 2011), lo que ocasiona en los atletas ciegos una menor velocidad de desplazamiento y por ende una velocidad menor en la entrada al salto.

Numerosos investigadores han encontrado correlación entre la velocidad alcanzada en la última fase de la carrera de aproximación a la batida y la distancia del salto (Bridgett y Linthorne, 2006; Brüggemann y Conrad, 1986; Fukashiro, 1989; Hay, 1986; Hay, 1993; Hay & Miller, 1985; Hay y Nohara, 1990; Hay et al, 1986; Nixdorf, Brüggemann, 1990; Koyama et al, 2011; Panoutsakopoulos et al, 2010). Sin embargo hay muy pocos estudios realizados con atletas ciegos en el salto de longitud, por lo que a la hora de valorar los resultados de los Juegos Paralímpicos Londres 2012, nos ceñimos a los datos obtenidos y, en todo caso, los comparamos con los obtenidos en la literatura sobre deportistas con discapacidad visual (Panoutsakopoulos et al, 2013) y atletas de elite sin discapacidad. Igualmente, a éstos habría que añadir la habilidad técnica del atleta en todas las fases del salto y el desarrollo de las habilidades motrices espacio temporal, tan importante en las personas ciegas.

Table 2. *Comparación de los parámetros biomecánicos de la aproximación a la batida entre saltadores F11, F12, F13 y sin discapacidad*

*OJO Número de tabla, estilo de tabla, completar datos. En Berlín y Daegu, mejor IAAF WCh Berlin 2009 y WCh Daegu 2011. No se distingue bien si son competiciones de ciegos o no. Ojo abreviaturas en inglés.*

| *Parameter* | *F11*  *JJPP London 2012* | *F12*  *IBSA 2009* | *F13*  *IBSA 2009* | *Copa de Europa 2007* | *Camp. Mundo 2009 Berlin* | *Camp. Mundo 2011 Daegu* |
| --- | --- | --- | --- | --- | --- | --- |
| S3L (m) | 1.99± | 1.95 ± 0.16 | 1.89 ± 0.15 | ± | 2.31± 0.08 | 2.21 ± 0.08 |
| S2L (m) | 2.20± | 2.12 ± 0.22 | 2.00 ± 0.17 | 2.39 ± 0.21 | 2.45±0.16 | 2.46 ± 0.18 |
| S1L (m) | 2.15± | 1.88 ± 0.09 | 1.82 ± 0.21 | 2.03 ± 0.12 | 2.21±0.12 | 2.19 ± 0.16 |
| SF3L (Hz) | 4.50± | 4.72 ± 0.34 | 4.81 ± 0.49 | ± | ± |  |
| SF2L (Hz) | 4.00± | 4.18 ± 0.44 | 4.07 ± 0.41 | ± | ± |  |
| SF1L (Hz) | 4.05± | 4.23 ± 0.30 | 4.17 ± 0.31 | ± | ± |  |
| Vx3L (m/s) | 8.16± | 8.45 ± 0.50 | 8.15 ± 0.62 | ± | 10.46± | 10.37 ± 0.32 |
| Vx2L (m/s) | 8.26± | 8.82 ± 0.60 | 8.37 ± 0.90 | 9.82 ± 0.40 | 10.52± | 9.63 ± 0.32 |
| Vx1L (m/s) | 8.38± | 8.41 ± 0.49 | 8.06 ± 0.70 | 9.82 ± 0.40 | 10.40± | 10.69 ± 0.30 |
| Distance (m) | *5.82 ±* | 6.07 ± 0.55 | 5.52 ± 0.91 | 7.40 ± 0.38 | 8.24 ± 0.19 | 8.26 ± 0.09 m |
| Tc3 | 0.126 |  |  |  | 0.88 |  |
| Tc2 | 0.120 |  |  |  | 0.80 |  |
| Tc1 | 0.139 |  |  |  | 0.103 |  |
| Tc0 | *0,134±0.016* |  |  |  | 0.119 | 0.12  ± 0.0 |

Si observamos las capacidades espacio-temporales que desarrollan los atletas en la entrada a la tabla de batida, encontramos diferencias estadísticamente significativas de la velocidad del BCM entre Vx1-Vx2, Vx1-Vx3, Vx2-Vx3 de los atletas ciegos (F11) y un aumento de la velocidad de entrada hasta el último paso, a diferencia de los discapacitados visuales (F12 y F13) y no discapacitados, que disminuyen ésta en el último paso o la mantienen (Mendoza & Nixdorf, 2011; Panoutsakopoulos et al, 2010; Theodorou et al., 2011; Theodorou et al., 2012 ). Asimismo observamos que los atletas con mayor discapacidad obtienen unos resultados menores en la velocidad de entrada y distancia de salto, lo que corrobora que existe una correlación entre la velocidad de aproximación y la distancia efectiva del salto (Hay et al., 1986; Lees et al., 1993; Nixdorf & Brüggemann, 1990).

Podemos observar que la velocidad horizontal del paso del grupo de London 2012, medida desde el primer contacto en el suelo hasta el siguiente contacto, es para los tres últimos pasos, respectivamente, de 8.05, 9.00 y 9.60 m/s. Este parámetro no lo encontramos recogido en la literatura, por lo que no podemos hacer una comparación con otros trabajos, si bien creemos que es interesante ya que valora la acción de las piernas, y que comparado con la velocidad de desplazamiento del BCM (Vx) es muy significativo el aumento de velocidad en la ejecución del gesto deportivo que realizan los saltadores ciegos.

La velocidad horizontal instantánea del BCM es de 8.18, 8.26 y 8.38 m/s. Ello quiere decir que en el último paso se da la mayor velocidad, lo que contrasta con investigaciones realizadas con atletas discapacitados visuales y otras de atletas de elite no discapacitados, donde se observa una pérdida de velocidad en el último paso, si bien no encontramos diferencias estadísticamente significativas entre las Vs1-Vs2, Vs1-Vs3, Vs2-Vs3 y las Vr1-Vr2, Vr1-Vr3, Vr2-Vr3. La velocidad horizontal instantánea (BCM) de los finalistas del Campeonato de Europa de lInternational Blind Sports Federation (IBSA) 2009 fue de 8.45, 8.82 y 8.41 m/s en los atletas discapacitados visuales de la categoría F12; y de 8.15, 8.37 y 8.06 m/s para los de la categoría F13, indicando que la pérdida de velocidad horizontal ocurre durante el soporte del último paso a diferencia de los atletas ciegos. Si analizamos otros trabajos realizados con atletas sin discapacidad observamos que en la Copa de Europa 2007 (European Athletics Association) y IAAF Campeonatos del Mundo 2009 y 2011, la velocidad horizontal instantánea de los finalistas en los 2-3 últimos pasos fue respectivamente de: 9.82 y 9.82; 10.46, 10.52 y 10.40; y 10.37, 9.63 y 10.69 m/s (Mendoza & Nixdorf, 2011; Panoutsakopoulos et al, 2010; Young-Sang et al. 2011).

Por último, la velocidad del centro de masas en el eje Y en el momento del despegue para los tres últimos pasos (Vy) es de 0.60, 0.60 y 0.40 m/s en el último paso, y una altura del BCM de 1.95, 2.10 y 0.85 cm, mostrando una pequeña oscilación del centro de masas en los tres pasos, si bien se indica la no existencia de diferencias estadísticamente significativas entre las variables h2-h3 y Vy2-Vy3.

En el aspecto espacial observamos que la longitud de los 3 últimos pasos es el único parámetro que no es significativo con el resultado de la prueba, si bien sí se observa que el resultado de la Ls1 y el de Ls3 tienen una tendencia similar a lo que indica la literatura en los atletas sin discapacidad. Si observamos los tres últimos pasos de aproximación, los atletas sin discapacidad describen una ratiode distancias de corto-largo-corto en el antepenúltimo, penúltimo y último respectivamente (Hay & Nohara, 1990, Kim et al., 2011; Koyama et al, 2011; Muller & Brüggemann, 1997; Seo et al.; Shimizu et al, 2011; Schiffer, 2011), igual que los discapacitados visuales F12-F13, que realizan 1.95, 2.12, 1.88 m; y 1.89, 2.00 y1.82 m respectivamente (Panoutsakopoulos et al., 20213, Theodorou et al., 2012). En nuestro estudio se ha encontrado que los saltadores ciegos F11 no acortan el último paso, realizando una longitud de los pasos de 1.99, 2.20 y 2.15 m, tal como indica la literatura para la realización de una buena acción de batida, suponemos que debido a la falta total de visión y anticipación de la batida.

También se ha estudiado la step frequency de cada uno de los tres últimos pasos, que está relacionada inversamente a la longitud de paso. Si antes comprobábamos el patrón de distribución de longitud de los últimos pasos como corto-largo-corto, en cuanto a la frecuencia de zancada es alta-baja-alta. No hemos encontrado estudios en la literatura que se refieran a esta variable en el salto de longitud. Por ello, utilizando los datos de longitud y velocidad de paso aportados en el estudio de Berlin 2009, se ha calculado la frecuencia del paso. Los valores medios son: 4,54, 4,31 y 4,73 Hz. De estos resultados se desprende que el patrón de frecuencia del grupo Berlin 2009 también presenta el valor más bajo en la penúltima zancada y el más alto en la última, pero con diferencias más pequeñas. Se han calculado también las diferencias relativas en la frecuencia, comparando 2L con 3L, y 1L con 2L. Para el grupo London 2012 se observa respectivamente un descenso de la frecuencia (4.33 %) y seguidamente un gran aumento (28.57 %). El grupo Berlin 2009 presenta cambios menos significativos en las dos comparaciones.

Al analizar los aspectos espacio temporales de cada una de las acciones antes de la batida y durante ésta, hemos observado que no existen diferencias estadísticamente significativas entre las variables Tf2-Tf3 y Ts2-Ts3, y sí que existen entre: Tc1-Tc2, Tc1-Tc3, Tc2-Tc3, Tf1-Tf2, Tf1-Tf3, Ts1-Ts2, Ts1-Ts3.

En la literatura no se encuentran muchos estudios que hayan medido el tiempo de contacto y el tiempo de vuelo en las últimas zancadas de la carrera de aproximación en el salto de longitud. En ocasiones, la poca precisión que ofrecían algunas grabaciones hacía que esos datos se tomaran con muchas reservas. En cambio, para el grupo de ciegos de London 2012, al haberse grabado a 300 Hz, creemos que es una velocidad suficiente para que experimentados observadores hayan obtenido resultados fiables. Así, nos dieron unos datos del tiempo de contacto de 0.126, 0.120 y 0.139 s en el antepenúltimo, penúltimo y último paso. Y el tiempo de batida en el despegue fue de 0.134 s.

En cuanto a las características de la duración de la batida, en la literatura se encuentra un promedio de 0.120 s para los atletas sin discapacidad (Ballreich y Brüggemann, 1986), que concuerda con lo indicado en Berlín 2009, donde la duración media de batida fue de 0.119 s (Mendoza y Nixdorf, 2011). Si analizamos los datos obtenidos por los atletas ciegos, la duración media de la batida fue de 0.134 s. Hemos de tener en cuenta que la batida tiene como objetivo transferir la velocidad de aproximación a la velocidad de despegue, por lo que la mayoría de los autores indican que ésta y la velocidad de aproximación a la batida son las variables que tienen mayor correlación con la distancia de salto lograda.

**Conclusiones**

La práctica atlética, y específicamente el salto de longitud, permite el desarrollo y control de las habilidades motrices espacio temporales a través de la orientación kinestésica y sensorial, pudiendo facilitar la vida diaria y deportiva de las personas ciegas o con discapacidad visual.

El número de pasos que son regulados mediante la orientación sensorial en la aproximación al salto de longitud tiene una correlación positiva con la distancia del salto. Nuestros resultados deben obligar a los entrenadores de salto de longitud a complementar la carrera de aproximación con ejercicios adicionales de orientación sonora, para animar a las personas ciegas a mejorar la percepción espacial y conseguir un mejor resultado deportivo.

En el estudio realizado hemos encontrado que los atletas ciegos no anticipan las acciones de piernas para la buena colocación en la batida, por lo que se deberían buscar elementos que permitan desarrollar estas acciones, similares a los atletas sin discapacidad.

**Referencias**

1. **Ballreich R,** Brüggemann G.-P**.** Biomechanik des Weitsprungs. In:Ballreich, R. & Kuhlow, A. (eds.):*Biomechanik der Sportarten, Band 1: Biomechanik der Leichtathletik***.** Enke Verlag Stuttgart, 1986
2. **Balsalobre-Fernández C,** Tejero-González CM, del Campo-Vecino J, Bavaresco N**.** The Concurrent Validity and Reliability of a Low-Cost, High-Speed Camera-Based Method for Measuring the Flight Time of Vertical Jumps**.** *Journal of Strength and Conditioning Research*2014; **28**(2) 528–533.
3. **Bradshaw EJ,** Aisbett B**.** Visual guidance during competition performance and run-through training in long jumping. *Sports Biomech*. 2006; **5**(1):1-14.
4. **Bridgett L A**, Linthorne NP. Changes in long jump take-off technique with increasingrun-up speed. *Journal of Sports Sciences* 2006; **24**(8): 889-897.
5. **Bruggemann GP,** Conrad T. Long jump. In: P. Susanka, G.-P. Bruggemann, E. Tsarouhas (editors), Biomechanical Research in Athletics-1st World Junior Championships, Athens 1986, 89-119. *Athens: SEGAS & EKAE*. 1986. doi:10.4100/jhse.2013.8.Proc3.13.
6. **Codina M.** Discapacidad visual, en Torralba, *Atletismo adaptado para personas ciegas y deficientes visuales*. Barcelona: Paidotribo, 2004.
7. **Comité Paralímpico Español**. *Paralímpicos*. Madrid: Autor, 2006.
8. **Dolins F.** & Mitchell, R. (2010). *Spatial cognition, spatial perception: Mapping the self and space.* New York, NY, USA: Cambridge Press 2010.
9. **Fukashiro S**. Evaluation of the efficient motion in the running long jump. In: L. Tsarouchas, J. Terauds, B. A. Gowitzke, & L. E. Holt (editors), *Biomechanics in Sports V* (pp. 104-111). Athens: HSRI. 1989.
10. **Gregory R.** Perceptual illusions and brain models. A *Discussion on the Logical Analysis of Cerebral Functions*. Royal Society of London. 1968; 279-296.
11. **Gregory R.** *Knowledge in perception and illusion*. Royal Society, 1997; **352**, 1121–28. DOI: 10.1098/rstb.1997.0095
12. **Gregory R**. Brainy Mind. *Brit. Med. Journal*; 1998; **317**, 1693-95.
13. **Gregory R.** Perception. *Perception Editorials* 2004; **33**, 895-896.
14. **Hatfield G.** *The natural and the normative: theories of spatial perception from Kant to Helmholtz.* Cambridge, MA, USA: MIT Press, 1990.
15. **Hatfield G.** *The natural and the normative: theories of spatial perception from Kant to Helmholtz.* Cambridge, MA, USA: MIT Press, 1990.
16. **Hay JG.** (1986). The biomechanics of the long jump. *Exerc Sport Sci Rev 1986;* **14**, 401-446.
17. **Hay JG.** Approach strategies in the long jumps. *International Journal of Sport Biomechanics 1988*; **4**(2): 114-129.
18. **Hay JG**, Koh TJ. Evaluating the approach in horizontal jumps. *International Journal of Sport Biomechanics* 1988; **4**: 372-392
19. **Hay JG**, Miller JA, Canterna RW. The techniques of elite male long jumpers. *Journal of Biomechanics* 1986; **19**(10): 855-866.
20. **Hay JG**,Miller JA. Techniques Used in the Transition from Approach to Take-off in the Long Jump**,** *International Journal Sport Biomechanics*1985; **1**: 174-184**.**
21. **Hay JG**, Nohara H. Techniques used by Elite Long Jumpers in Preparation for Takeoff; *J. Biomech*, 1990; **23**-3: 229-239
22. **Hay JG**. Citius, altius, longius (faster, higher, longer): the biomechanics of jumping for distance. *Journal of biomechanics* 1993; **26** Suppl 1: 7-21.
23. **Hay JG**. Citius, altius, longius (faster, higher, longer): the biomechanics of jumping for distance. *Journal of biomechanics* 1993; **26** Suppl 1: 7-21
24. **Hay JG**. The biomechanics of the long jump. Exercise *and Sports Science Reviews* 1986; **14**: 401-446.
25. **International Paralympic** **Committee**. Athletics Classification. Rules and Regulations 2011. https://www.paralympic.org/athletics/classification/rules-and-regulations Accessed 10 Abril 2016
26. **International Paralympic Committee** Athletics Rules and Regulations 2016-2017, January 2016. https://www.paralympic.org/sites/default/files/document/160428154029551_2015_12+IPC+Athletics+Rules+and+Regulations_A4_WEB2.pdf Accessed 20 Abril 2016.
27. **Johns G.** & Saks A. *Organizational Behaviour: Understanding and Managing Life at Work with MyOBLab*. Upper Saddle River, NJ, USA: Prentice Hall, 2010.

http://dx.doi.org/10.2190/X9BA-KJ68-07AN-QMJ8

1. **Kim HM,** Woo SY, Kim YM, Nam KJ, Park YH, Seo JS. Kinematic analysis of women’s long jump at IAAF World Championships Daegu 2011. *Korean J sport Biomech. 2011;* **21** (5): 603-610.
2. **Koyama H,** Muraki Y, AE M. Target value for the maximum run-up speed of the long jump based on the performance level. *Port J Sport Sci.* 2011; **11**(Suppl. 2): 299-302.
3. **Lees A**, Fowler N, Derby D. A biomechanical analysis of the last stride, touch‐down and take‐off characteristics of the women's long jump. *Journal of Sports Sciences* 1993; 11(4): 303-314
4. **Mendoza L**, Nixdorf E. Biomechanical Analysis of the Horizontal Jumping Events at the 2009 IAAF World Championships in Athletics. *New Studies in Athletics* 2011; **26**(3/4): 25-60.
5. **Montagne G,** Cornus S, Glize D, Quaine F, Laurent M. A perception-action coupling type of control in long jumping. *J Motor Behav.* 2000; **32**(1): 37-43**.**
6. **Morrison DE,** Henkel, RE (Eds.).*The significance test controversy: A reader***.** Aldine Transaction Publishers, 2006.
7. **Nixdorf E**, Brüggemann GP. *Biomechanical analysis of the long jump Scientific Research Project at the Games of the XXIVth Olympiad - Seoul 1988*. IAAF 1990; Italy: 263-301
8. **Muller H,** Bruggemann GP.Long Jump**.** *New Stud Athl. 1997;* **13**(2-3): 56-59.
9. **Nojima O.** Development of High Speed Digital Camera: EXILIM EX-F1**.** *Journal of The Society of Photographic Science and Technology of Japan* 2011**; 72**(3): 195-198**.**
10. **Palmi J.** La percepción: Enfoque funcional de la visión.*Apunts*2007; **2**, 81-85**.**
11. **Panoutsakopoulos V**, Papaiakovou G, Katsikas F, et al. 3D Biomechanical analysis of the preparation of the long jump take-off. *New Studies in Athletics* 2010; **25**: 55-68.
12. **Panoutsakopoulos, V**; Theodorou, A; Kotzmanidou, M; Skordilis, E; Kollias, I. Biomechanical analysis of the final strides of the approach and the take-off by visually impaired class F12 and F13 long jumpers. *Journal of Human Sport & Exercise.* 2013; North America, 8, sep. 2013. Available at: <http://www.jhse.ua.es/jhse/article/view/599/830>. Accessed: 31 May 2016.
13. **Rosa A,** Ochaíta E. Psicología de la ceguera. Madrid: Alianza Psicología, 1993.
14. **Schiffer J**. The horizontal jumps. *New Studies in Athletics* 2011; **26**(3/4): 139-164.
15. **Seo JS,** Woosy, KIM yw, Nam YH, Kim HM. Kinematic analysis of the men’s long jump in the IAAF world Championships, Daegu 2011. *Korean J Sport Biomech.* 2011*.* **21**(5): 595-602.
16. **Shimizu Y,** Ae M, Koyama H. A biomechanical study of the takeoff preparation and the takeoff motions in elite male long jumpers. *Port J Sport Sci.* 2011;**11**(2): 381-383.
17. **Scott MA,** Li FX, Davids K**.** Expertise and the regulation of gait in the approach phase of the long jump**.** *J Sports Sci***.** 1997; **15**(6):597-605.
18. **Theodorou A**, Skordilis E. Evaluation the approach run of class F11 visually impaired athletes in triple and long jumps. *Percept Mot Skills.* 2012;114(2): 595-609.
19. **Theodorou A**, Skordilis E, Tasoulas E, Smirniotou A, Paradis G. Stride regulation at the approach phase of long jump in visually impaired (F13) athletes. *Port J Sport Sci.* 2011; **11**(Suppl.2): 395-397.
20. **Theodorou A,** Skordilis E, Plainis S, Tasoulas E, Panoutsakopoulos V, Padulles-Riu J, Torralba M, Panteli F. Stride length regulation at the approach phase of long jump in visually impaired (F12 class) athletes. In: E.J. Bradshaw, A Burnett, & P.A. Hume (editors) *Proceedings of the 30th International Congress in Sports Biomechanics* (pp. 33-36). Melbourne: ISS. 2012.
21. **Torralba MA**, Padullés JM, Braz M, Robert M. (2015). Cinemática del salto de longitud de personas ciegas. *EFDeportes.com* 2015, Revista Digital. Buenos Aires, **19** (201). http://www.efdeportes.com/ Accessed: 22 May 2015
22. **Webborn A D**. Fifty years of competitive sport for athletes with disabilities: 1948-1998. *Br J Sports Med* 1999;33: 138 doi:10.1136/bjsm.33.2.138
23. **Young-Sang B** et al. Biomechanics Research Project in the IAAF World Championships Daegu 2011. *Korean Society of Sport Biomechanics*. 2011. [www.jaaf.or.jp/t-f/pdf/Daegu2011.pdf](http://www.jaaf.or.jp/t-f/pdf/Daegu2011.pdf) Accessed 31 May 2016.

Acknowledgements: International Paralympic Committee

Funding. Ministerio de Economia y Competitividad (Sapin), DEP2012-32124, UB I INEFC

Competing interests None.
